# Supplementary material
Source: Research Square preprint supplement (doi:10.21203/rs.3.rs-10186809/v1)
Supplement: Supplementary file 1 [file 95370d5cb73f3776bee0cb0f.docx]

**Supporting Information**

**Fig.S1**. A) Uv. Vis spectra of CQDs, b) Uv. Vis spectra of R-CQDs

**Fig.S2.** The 3D plot for interaction effects between pH and time at Temp.= 45 ◦C (A), pH and Temp at 9.5 min (B) and temp and time at pH = 5.5 (C) for the response surface quadratic model.

**Fig. S3.** Diagnostic plots for the Central Composite Design (CCD) methodology adequacy (A ) Residuals vs. Predicted plot (B) The Normal Plot of Residuals (C) residual versus fitted values and (D) Residuals vs. Run plot.

**Fig.S4**. Fluorescence response of CQDs to various compounds

**Fig.S5.** Fo/F ratio of R-CQDs in the presence of various compounds of blue rods represent metronidazole alone, orang rods represent a mixture of metronidazole (250 µM) with other compounds (500 µM).
